# Supplementary material
Source: publisher figshare collection journal article supplement (https://acs.figshare.com/ndownloader/files/31080438)
Supplement: Supplementary file 1 [file 31080438]

## Supporting Information

### Chemical and Electronic Investigation of Buried $\text{NiO}_{1-\delta}$ , PCBM, PTAA/MAPbI<sub>3-x</sub>Cl<sub>x</sub> Interfaces using Hard X-ray Photoelectron Spectroscopy and Transmission Electron Microscopy

Ibrahima Gueye\*,<sup>1,2</sup> Yasuhiro Shirai\*,<sup>3</sup> Dhruba B. Khadka,<sup>3</sup> Okkyun Seo,<sup>1,2</sup> Satoshi Hiroi,<sup>1,2,4</sup> Masatoshi Yanagida,<sup>3</sup> Kenjiro Miyano,<sup>3</sup> and Osami Sakata\*<sup>1,2,5,6</sup>

<sup>1</sup>*Synchrotron X-ray Group, Research Center for Advanced Measurement and Characterization, National Institute for Materials Science (NIMS), 1-1-1 Kouto, Sayo, Hyogo 679-5148, Japan*

<sup>2</sup>*Synchrotron X-ray Station at SPring-8, Research Network and Facility Services Division, NIMS, 1-1-1 Kouto, Sayo, Hyogo, Japan.*

<sup>3</sup>*Centre for Green Research on Energy and Environmental Materials,*

*National Institute for Materials Science (NIMS), 1-1 Namiki, Tsukuba, Ibaraki 305-0044, Japan*

<sup>4</sup>*Present Address: Diffraction and Scattering Division, Center for Synchrotron Radiation Research, Japan Synchrotron Radiation Research Institute (JASRI), Sayo, Hyogo 679-5198, Japan*

<sup>5</sup>*Department of Materials Science and Engineering, Tokyo Institute of Technology, Nagatsuta, Midori, Yokohama 226-8502, Japan.*

<sup>6</sup>*Center for Synchrotron Radiation Research, Japan Synchrotron Radiation Research Institute (JASRI), Kouto, Sayo, Hyogo, 679-5198 Japan.*

*Corresponding Authors: GUEYE.Ibrahima@nims.go.jp; SHIRAI.Yasuhiro@nims.go.jp; sakata.osami@spring8.or.jp*

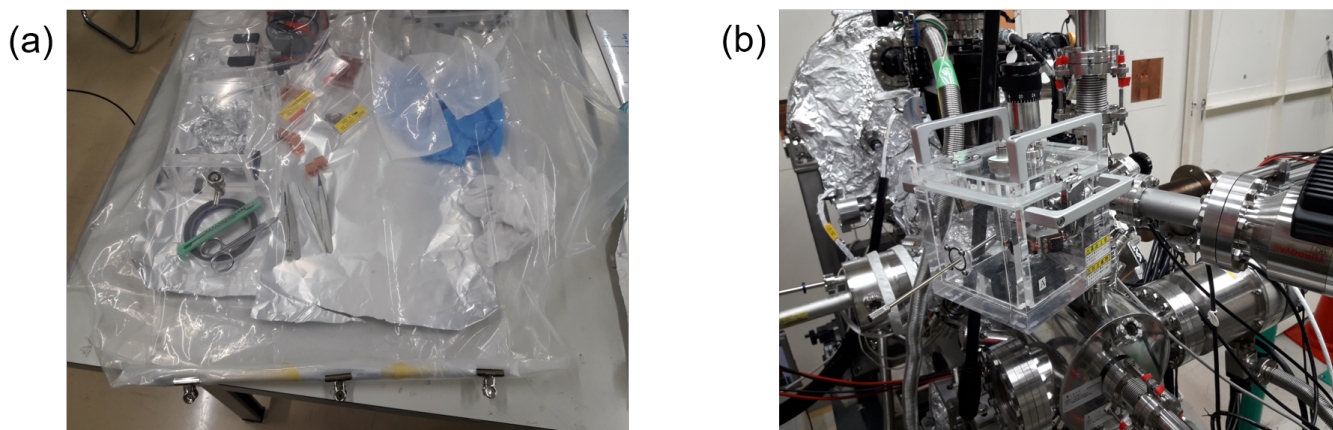

Figure S1: Transport samples for HAXPES analysis without subsequent contact with the ambient atmosphere: (a) unloading and sticking of samples on the sample holders under controlled environment and (b) prepared in the glove box (under argon) that fits to the introduction chamber at BL15XU of SPring-8.

Table S1: Summary of the peak fitting parameters from Pb 4f, I 3d, C 1s and N 1s elements: colors, components, binding energy (BE) in eV, Lorentzian Gaussian (L:G) ratio) and full width at half maximum (FWHM) are respectively listed.

| Elements | Colors        | Components                                              | BE(eV)      | GL(%) | FWHM (eV)   |
|----------|---------------|---------------------------------------------------------|-------------|-------|-------------|
| Pb 4f    | Cyan          | Pb reduced                                              | 136.9       | 30    | 0.60        |
|          | Wine          | HaP                                                     | 137.8       | 30    | 0.66 - 0.68 |
|          | Green         | $V'_{MA}/I'_I$ (HaP)                                    | 138.1       | 30    | 0.70 - 1    |
|          | Orange        | PbI <sub>2</sub>                                        | 138.7       | 30    | 0.70 - 1    |
| I 3d     | Wine          | HaP                                                     | 618.7       | 30    | 0.98 - 1    |
|          | Orange        | PbI <sub>2</sub>                                        | 619.4       | 30    | 1.2         |
|          | Yellow        | HI/I <sub>2</sub>                                       | 619.9       | 30    | 1.5         |
|          | Olive         | CH <sub>3</sub> I                                       | 620.7       | 30    | 1.3         |
| C 1s     | Magenta       | C sp <sup>2</sup>                                       | 284.4-284.6 | 30    | 0.9 - 1.0   |
|          | Cyan          | C sp <sup>3</sup>                                       | 284.9-285.1 | 30    | 0.9 - 1.2   |
|          | Wine          | HAP/C-O/C-N                                             | 285.7-286.0 | 30    | 1.2 - 1.8   |
|          | Olive         | MAI/C=O                                                 | 286.8-287.0 | 30    | 1.2 - 1.8   |
|          | Orange        | COO-/CO <sub>3</sub>                                    | 288.6       | 30    | 2.3 - 2.5   |
|          | Green         | $\pi \rightarrow \pi^*$                                 | 291.0-293.1 | 30    | 2.5         |
| N 1s     | Violet        | NH <sub>3</sub> (NiO <sub>1-<math>\delta</math></sub> ) | 398.4       | 30    | 1.2         |
|          | Blue          | NH <sub>3</sub> (HaP)                                   | 398.9       | 30    | 1.2         |
|          | Light Gray    | CH-NH <sub>2</sub>                                      | 399.5       | 30    | 1.2         |
|          | Light Magenta | CH <sub>3</sub> -NH <sub>2</sub>                        | 400.1       | 30    | 1.2         |
|          | Light Cyan    | Dissociation MAI                                        | 401.0       | 30    | 1.2         |
|          | Wine          | HaP                                                     | 401.7       | 30    | 1.2         |
|          | Pink          | MAI                                                     | 402.5       | 30    | 1.2         |

# $\text{MAPbI}_{3-x}\text{Cl}_x$ as deposited

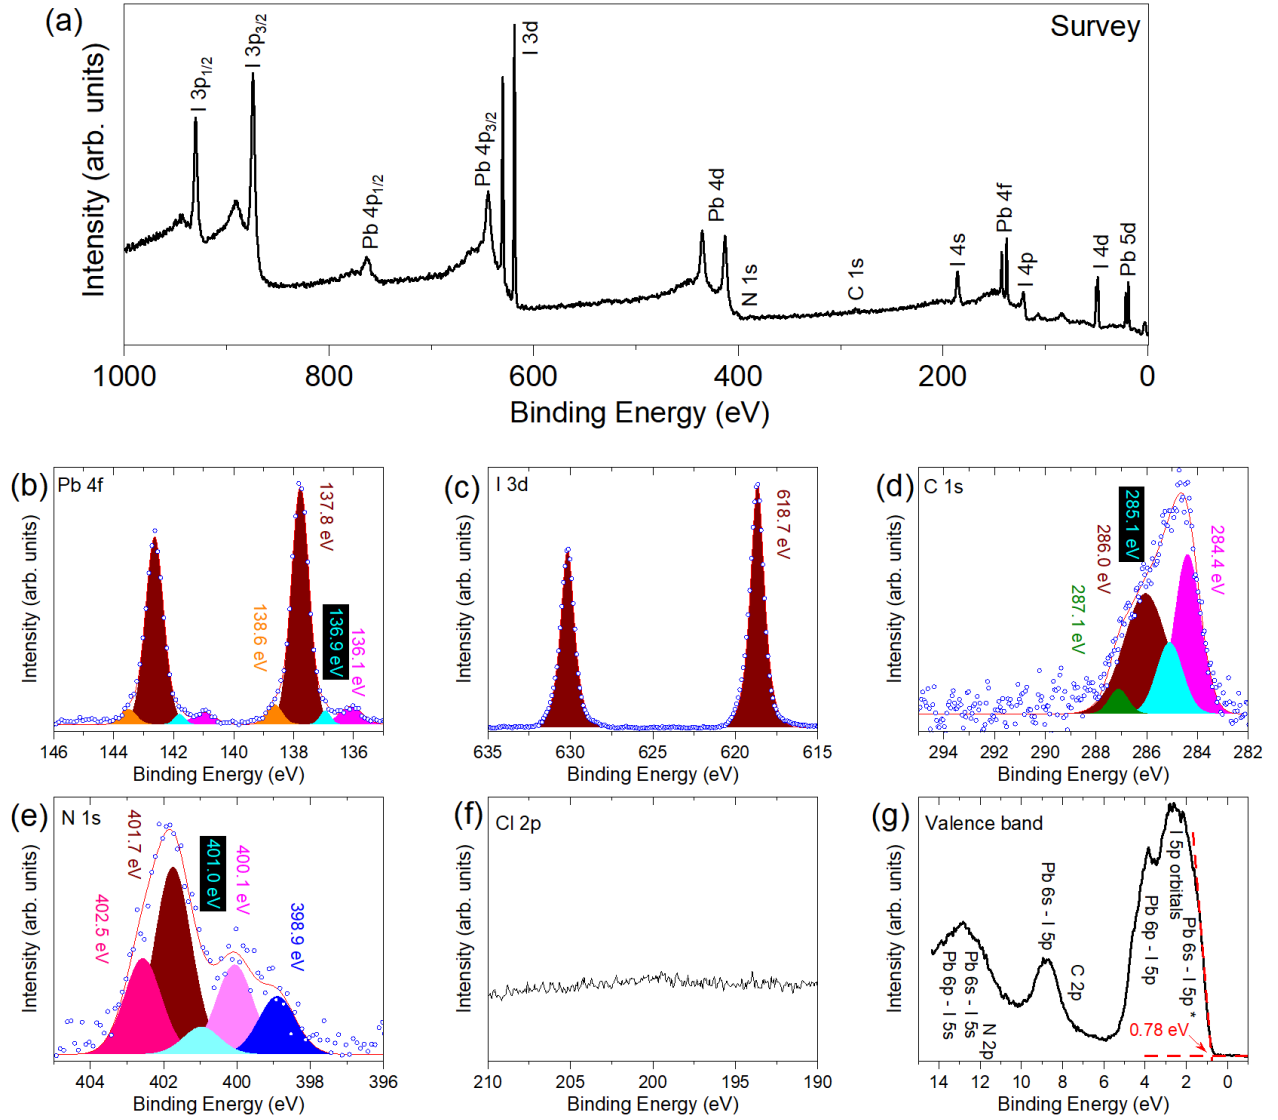

Figure S2: Bulk sensitivity of HAXPES measurements on the  $\text{MAPbI}_{3-x}\text{Cl}_x$  (HaP:  $x < 1\%$  and thickness around 300 nm) perovskite layer: (a) Survey, (b) Pb 4f, (c) I 3d, (d) C 1s, (e) N 1s, (f) Cl 2p and (g) valence band spectra. Open circles are the experimental points, red lines the best fit, colored peaks the different components. Descriptions of Pb 4f, I 3d, C 1s and N 1s components are reported in the Table S2.

Table S2: Experimental core level binding energy and components of Pb 4f, I 3d, C 1s and N 1s from HaP ( $\text{MAPbI}_{3-x}\text{Cl}_x$ ) thin film in Fig. S2.

| Pb 4f      |                | I 3d       |            | C 1s       |                 | N 1s       |                          |
|------------|----------------|------------|------------|------------|-----------------|------------|--------------------------|
| Peaks (eV) | Components     | Peaks (eV) | Components | Peaks (eV) | Components      | Peaks (eV) | Components               |
| 136.1      | $\text{Pd}^0$  | 618.7      | HaP/MAI    | 284.4      | C $\text{sp}^2$ | 398.9      | $\text{NH}_3$            |
| 136.9      | Pb reduced     | -          | -          | 285.1      | C $\text{sp}^3$ | 400.1      | $\text{CH}_3\text{NH}_2$ |
| 137.8      | HaP/MAI        | -          | -          | 286.0      | HaP             | 401.0      | Dissociation MAI         |
| 138.6      | $\text{PbI}_2$ | -          | -          | 287.1      | MAI             | 401.7      | HaP                      |
| -          | -              | -          | -          | -          | -               | 402.5      | MAI                      |

## Investigation of Aging HaP/TLM junctions

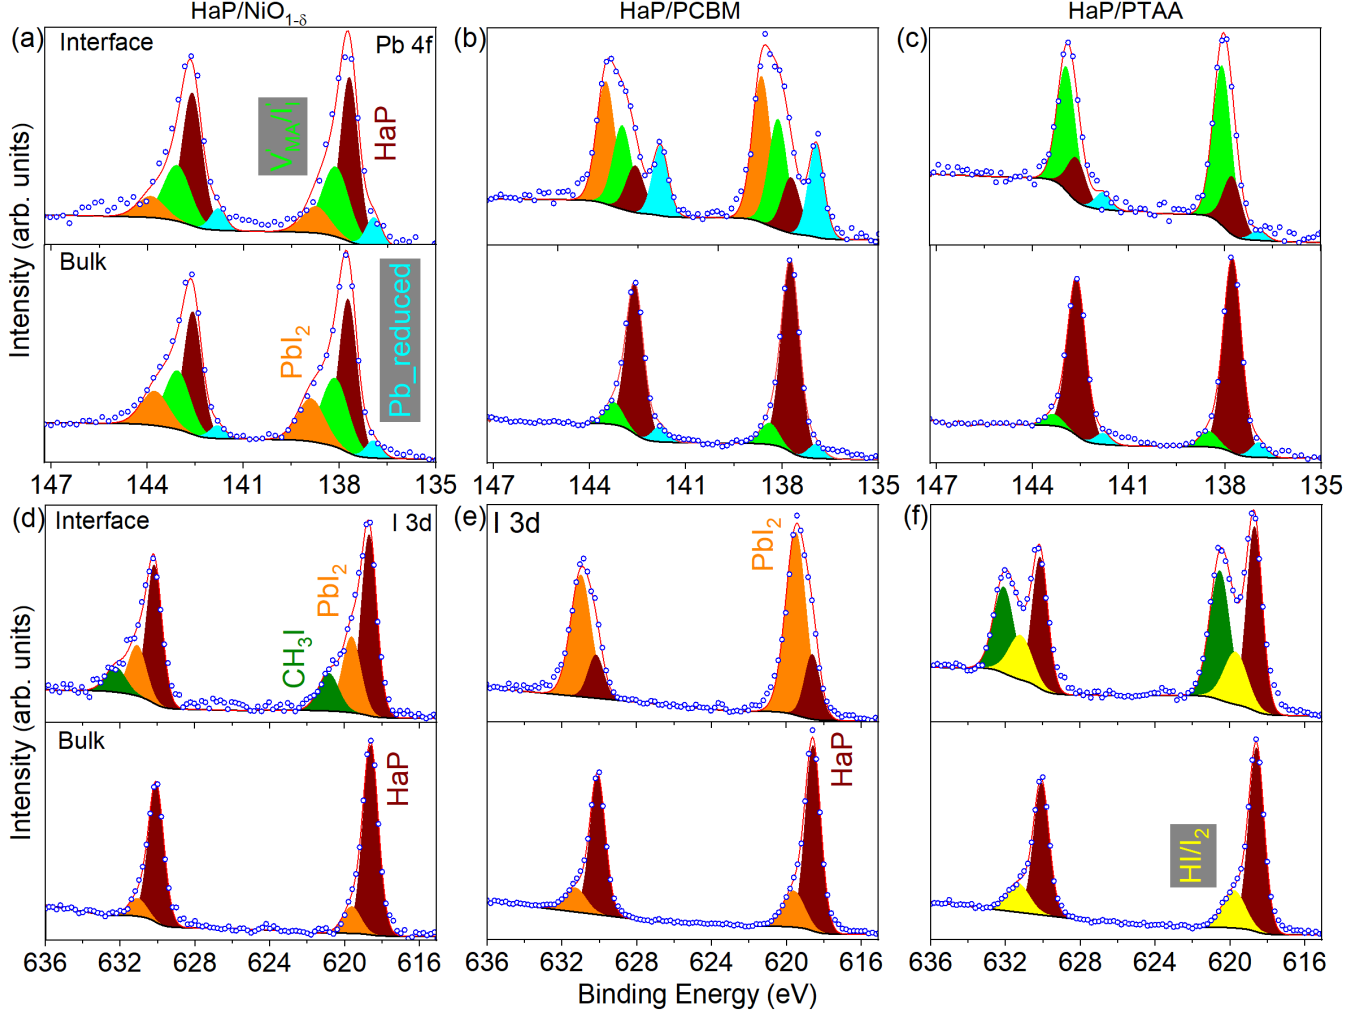

Figure S3: Core level Pb 4f (a–c) and I 3d (d–f) spectra from glass/ITO/HaP/TLM. TLM stands for transport layer material ( $\text{NiO}_{1-\delta}$ , PCBM and PTAA). From aging samples, bulk ( $\theta = 87^\circ$ ) and interface ( $\theta = 30^\circ$ ) enhanced sensitive probing are reported respectively.

Table S3: I/Pb ratio obtained from relative elemental concentrations of I 3d and Pb 4f core levels reported on Fig. S3

|           | HaP-bare | HaP/ $\text{NiO}_{1-\delta}$ | HaP/PCBM | HaP/PTAA |
|-----------|----------|------------------------------|----------|----------|
| Bulk      | 2.8      | 0.2                          | 1.9      | 0.7      |
| Interface | -        | 1.8                          | 0.9      | 4.2      |

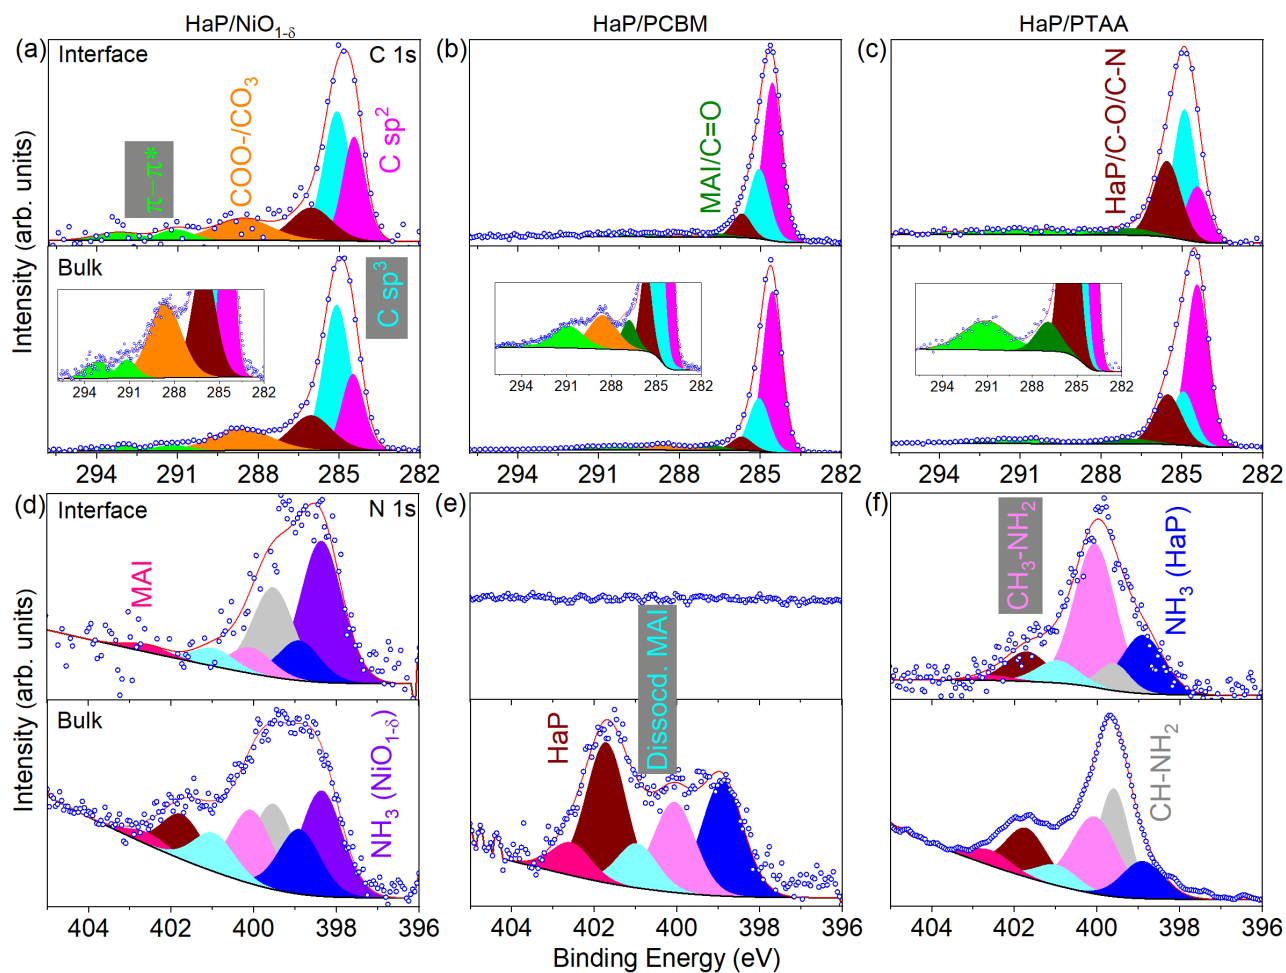

Figure S4: Core level C 1s (a–c) and N 1s (d–f) spectra from glass/ITO/HaP/TLM. TLM stands for transport layer material ( $\text{NiO}_{1-\delta}$ , PCBM and PTAA). From aging samples, bulk ( $\theta = 87^\circ$ ) and interface ( $\theta = 30^\circ$ ) enhanced sensitive probing are reported respectively.

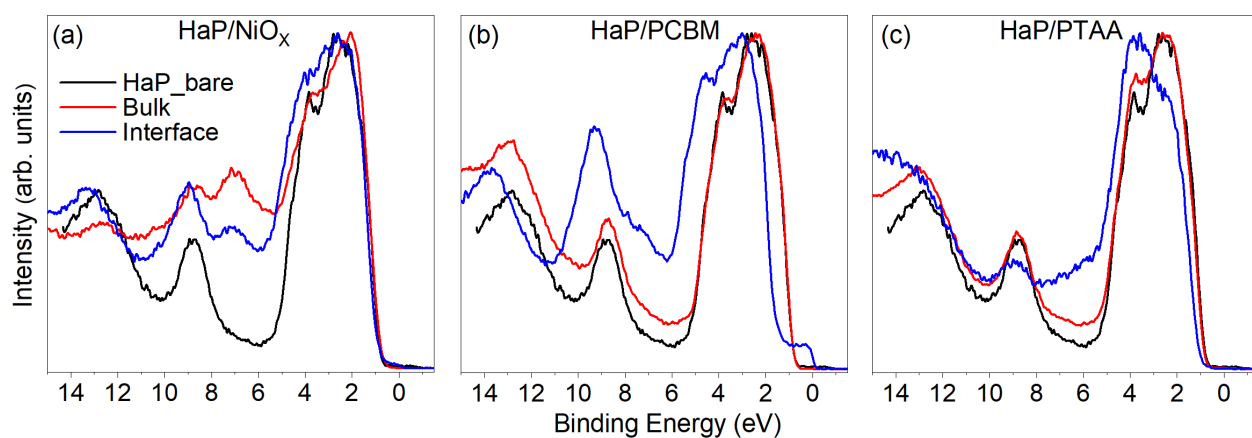

Figure S5: Valence band spectra from aging junctions: (a)  $\text{HaP/NiO}_{1-\delta}$ , (b)  $\text{HaP/PCBM}$  and (c)  $\text{HaP/PTAA}$ . Bulk and interface stand for bulk ( $\theta = 87^\circ$ ) and interface ( $\theta = 30^\circ$ ) sensitive probing, respectively. The valence state from the HaP as deposited (HaP-bare) is highlighted in the black curve.

## Glass/ITO/NiO<sub>1-δ</sub> structures

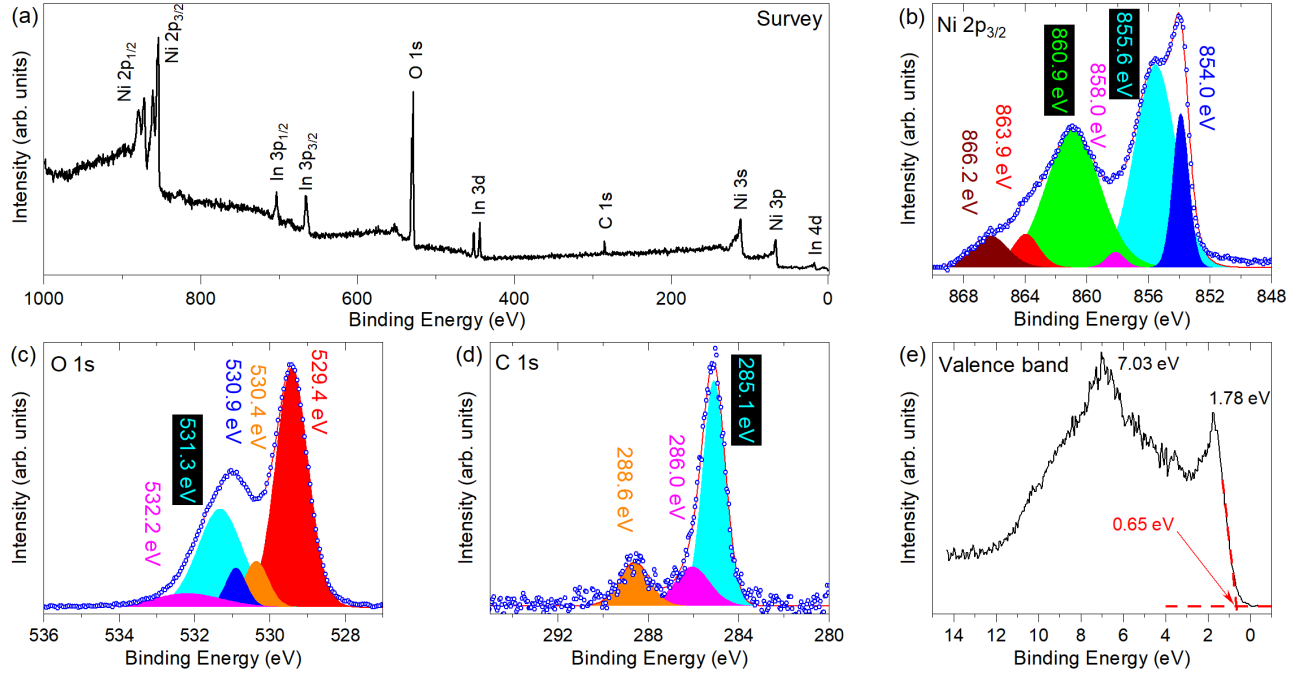

Figure S6: Bulk sensitivity of HAXPES measurements on the Glass/ITO/NiO<sub>1-δ</sub> structures: (a) Survey, (b) Ni 2p<sub>3/2</sub>, (c) O 1s, (d) C 1s and (e) valence band spectra. Open circles are the experimental points, red lines the best fit, colored peaks the different components. Descriptions of Ni 2p<sub>3/2</sub>, O 1s and C 1s components are reported in the Table S4.

Table S4: Experimental core level binding energy and components of Ni 2p<sub>3/2</sub>, O 1s and adventitious C 1s from NiO<sub>1-δ</sub> deposited on Glass/ITO substrate in Fig. S6 and Fig. S7.

| Ni 2p <sub>3/2</sub> |                  | O 1s       |                                | C 1s (adventitious) |            |
|----------------------|------------------|------------|--------------------------------|---------------------|------------|
| Peaks (eV)           | Components       | Peaks (eV) | Components (eV)                | Peaks (eV)          | Components |
| 854.0                | Ni <sup>2+</sup> | 529.4      | NiO                            | 285.1               | C-C/C-H    |
| 855.6                | Ni <sup>3+</sup> | 530.4      | NiO*OH                         | 286.0               | C-O/C-N    |
| 858.0                | Intersite        | 530.9      | Ni(OH) <sub>2</sub>            | 288.6               | O-C=O      |
| 860.9                | Sat I            | 531.3      | Ni <sub>2</sub> O <sub>3</sub> | -                   | -          |
| 863.8                | Sat II           | 532.2      | NiOO*H                         | -                   | -          |
| 866.6                | Sat III          | -          | -                              | -                   | -          |

# Glass/ITO/HaP/NiO<sub>1-δ</sub> structures

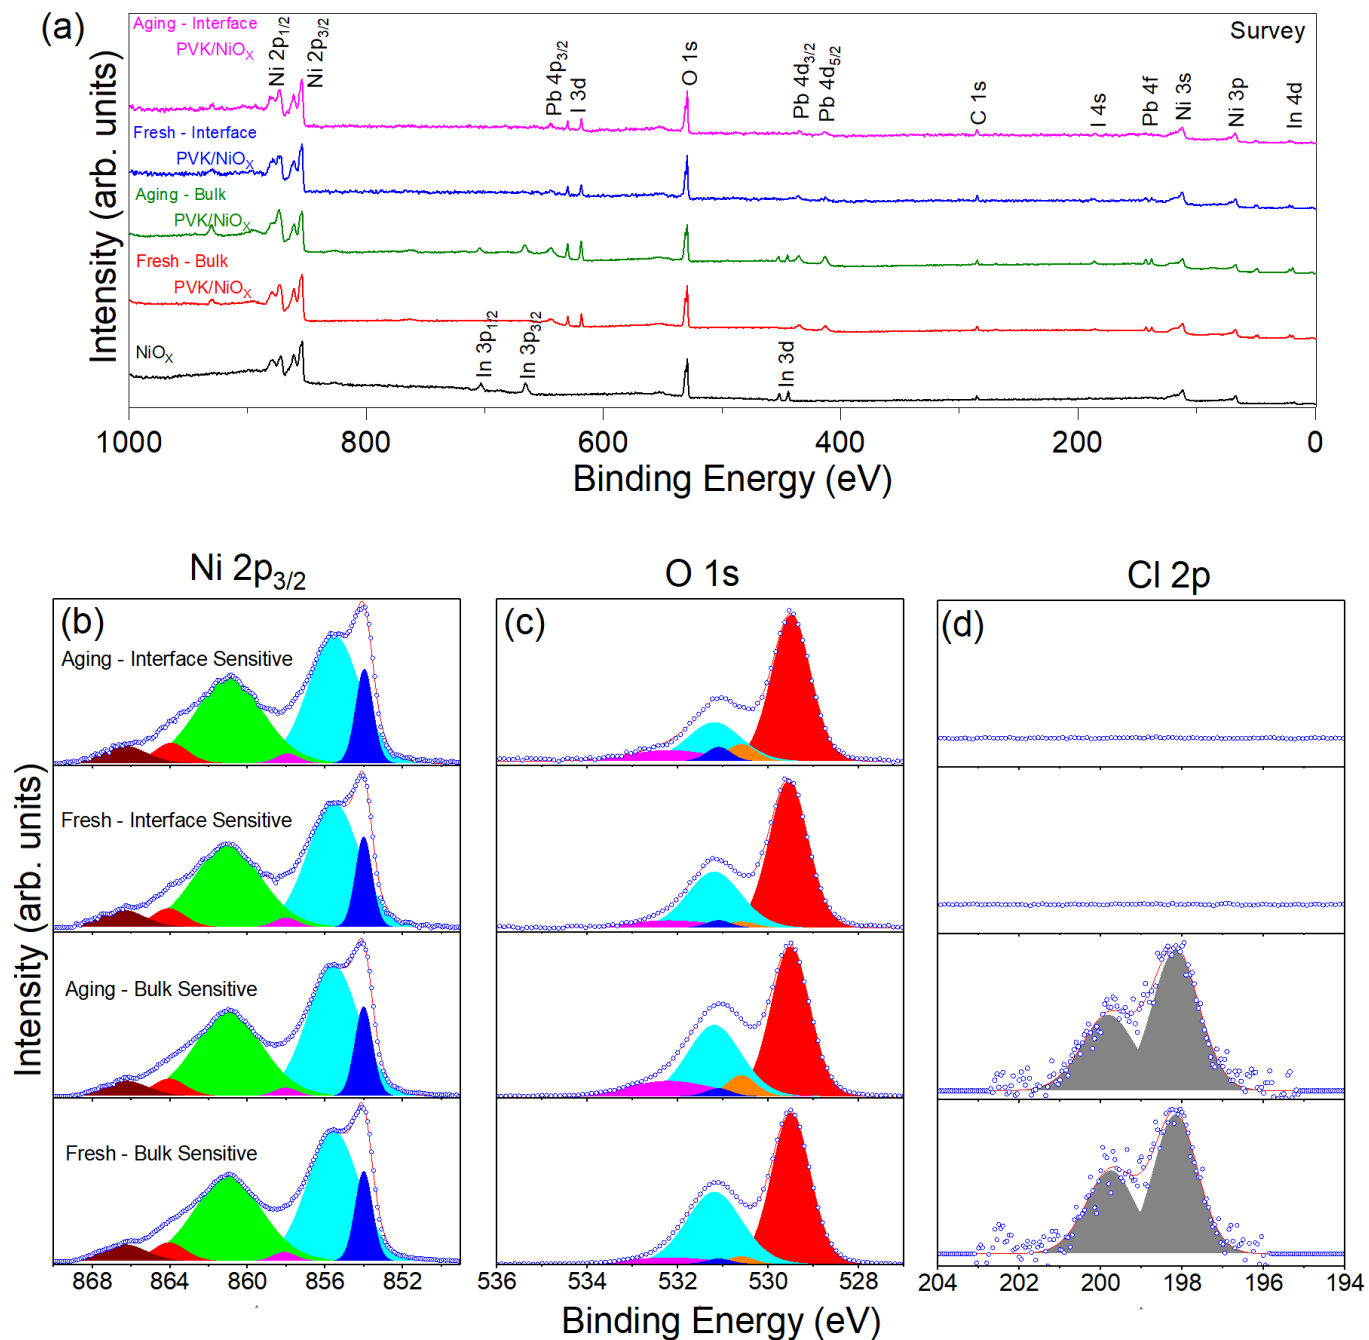

Figure S7: Probing depth HAXPES measurements for fresh and aging Glass/ITO/HaP/NiO<sub>1-δ</sub> structures: (a) Survey, (b) Ni 2p<sub>3/2</sub>, (c) O 1s and (d) Cl 2p spectra. Cl is from the HaP. Open circles are the experimental points, red lines the best fit, colored peaks the different components. Descriptions of Ni 2p<sub>3/2</sub> and O 1s components are reported above in the Table S3.



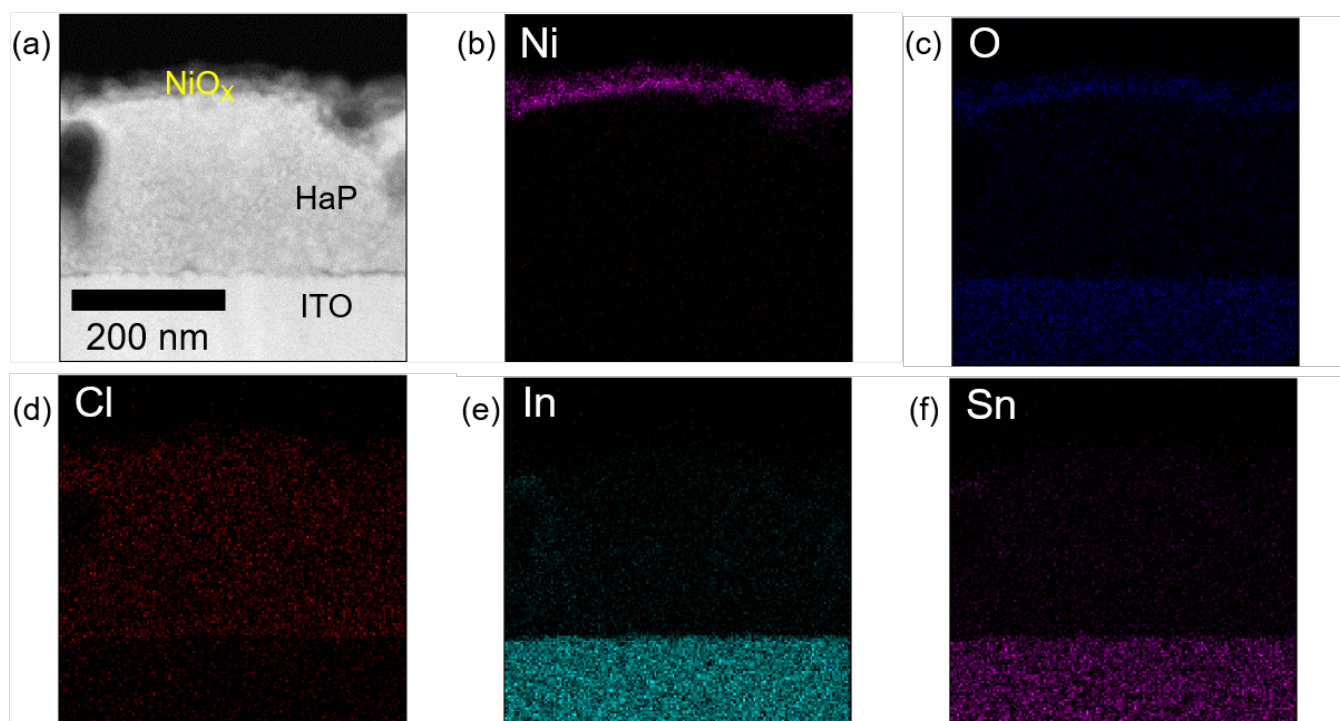

Figure S8: Cross-sectional STEM-ADF images and corresponding EDX maps of glass/ITO/HaP/NiO<sub>1-δ</sub> structures. Glass/ITO/HaP/NiO<sub>1-δ</sub> stacking (a) ADF image and individual chemical EDX maps of elemental (b) Ni, (c) O, (d) Cl, (e) In and (f) Sn.



## Glass/ITO/PCBM structures

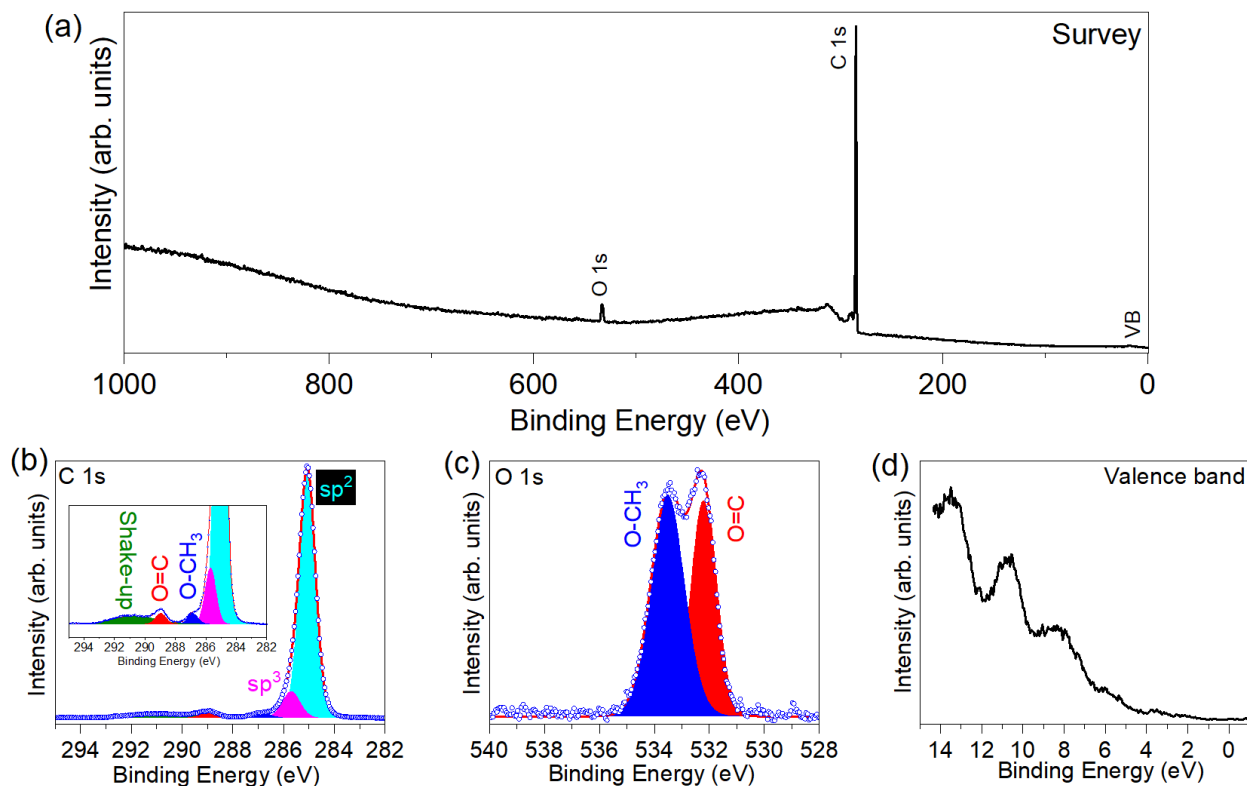

Figure S9: Bulk sensitivity of HAXPES measurements on the Glass/ITO/PCBM structures: (a) Survey, (b) C 1s, (c) O 1s and (d) valence band spectra. Open circles are the experimental points, red lines the best fit, colored peaks the different components. Descriptions of O 1s and C 1s components are reported in the Table S5.

Table S5: Experimental core level binding energy and components of C 1s and O 1s from PCBM deposited on Glass/ITO substrate in Fig. S9 and Fig. S10.

| C 1s       |                   | O 1s       |                      |
|------------|-------------------|------------|----------------------|
| Peaks (eV) | Components        | Peaks (eV) | Components (eV)      |
| 285.0      | C sp <sup>2</sup> | 530.7      | -OH                  |
| 285.7      | C sp <sup>3</sup> | 531.7      | -COO/CO <sub>3</sub> |
| 286.9      | O-CH <sub>3</sub> | 532.2      | O=C                  |
| 289.0      | O=C               | 533.0      | C-O-C                |
| 290.7      | Shake-up          | 533.5      | O-CH <sub>3</sub>    |

# Glass/ITO/HaP/PCBM structures

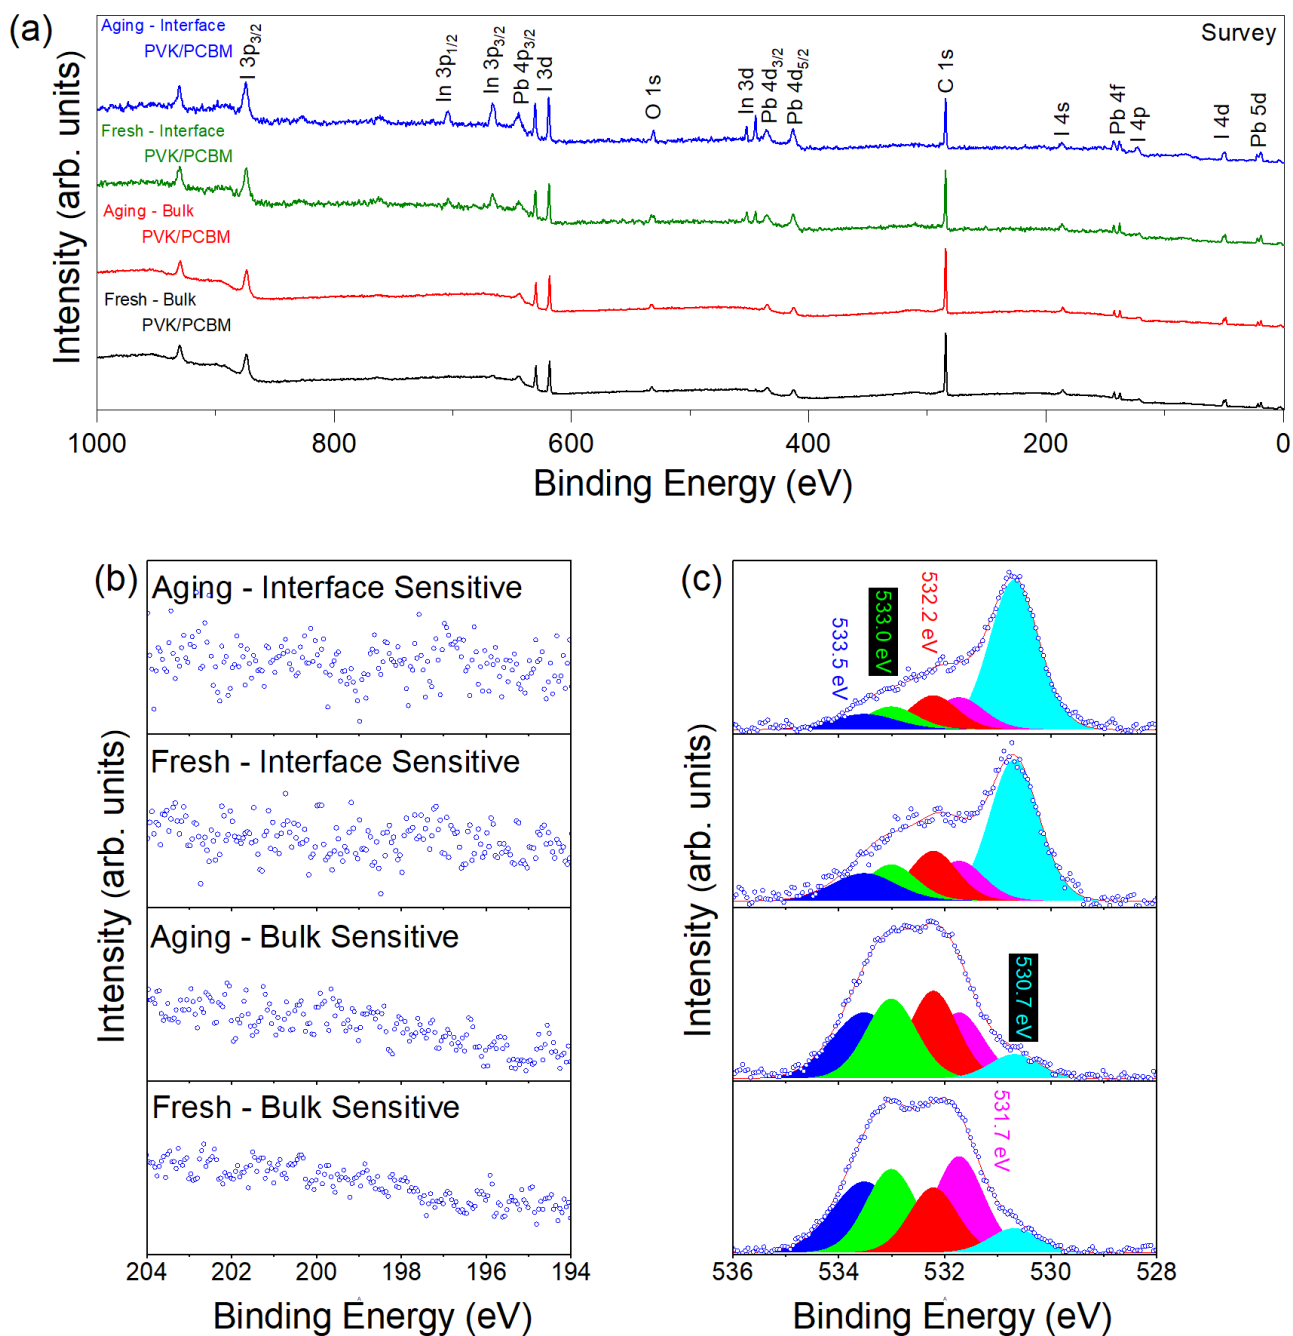

Figure S10: Probing depth HAXPES measurements for fresh and aging Glass/ITO/HaP/PCBM structures: (a) Survey, (b) Cl 2p and (c) O 1s spectra. Open circles are the experimental points, red lines the best fit, colored peaks the different components. Descriptions of O 1s components are reported above in the Table S4.

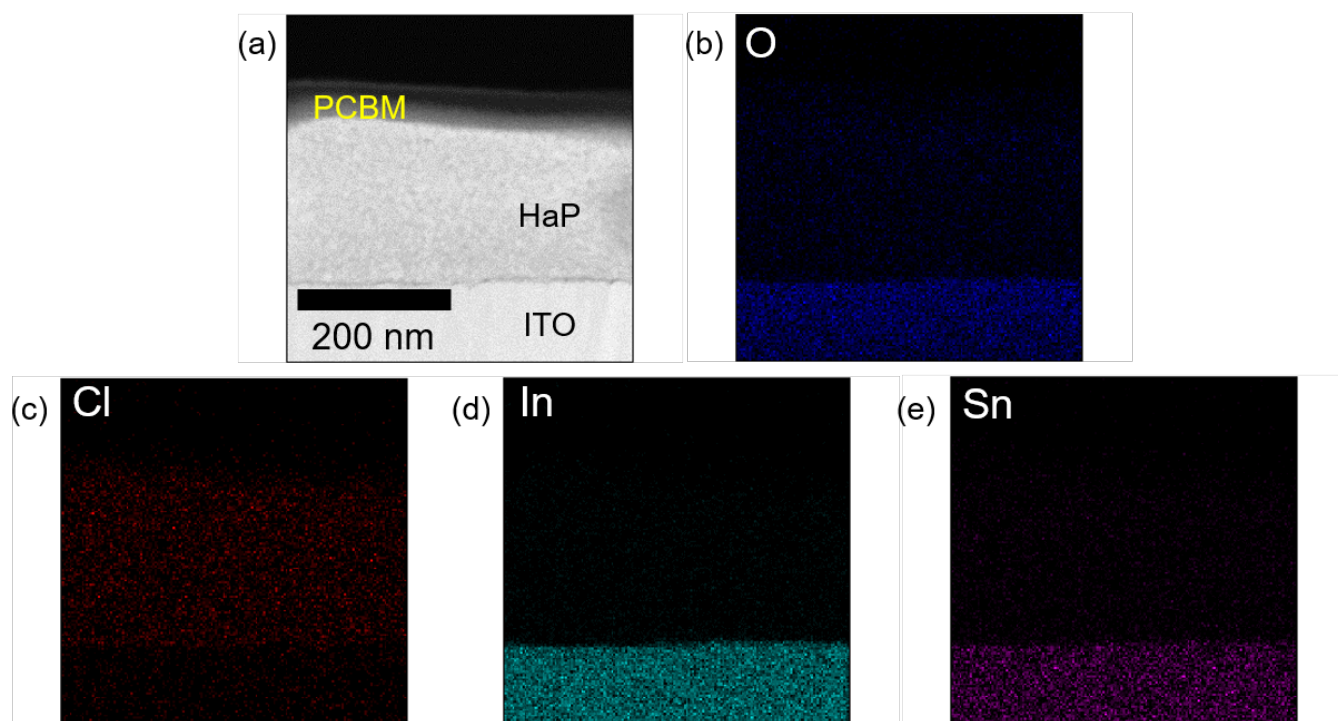

Figure S11: Cross-sectional STEM-ADF images and corresponding EDX maps of glass/ITO/HaP/PCBM structures. Glass/ITO/HaP/PCBM stacking (a) ADF image and individual chemical EDX maps of elemental (b) O, (c) Cl, (d) In and (e) Sn.

## Glass/ITO/PTAA structures

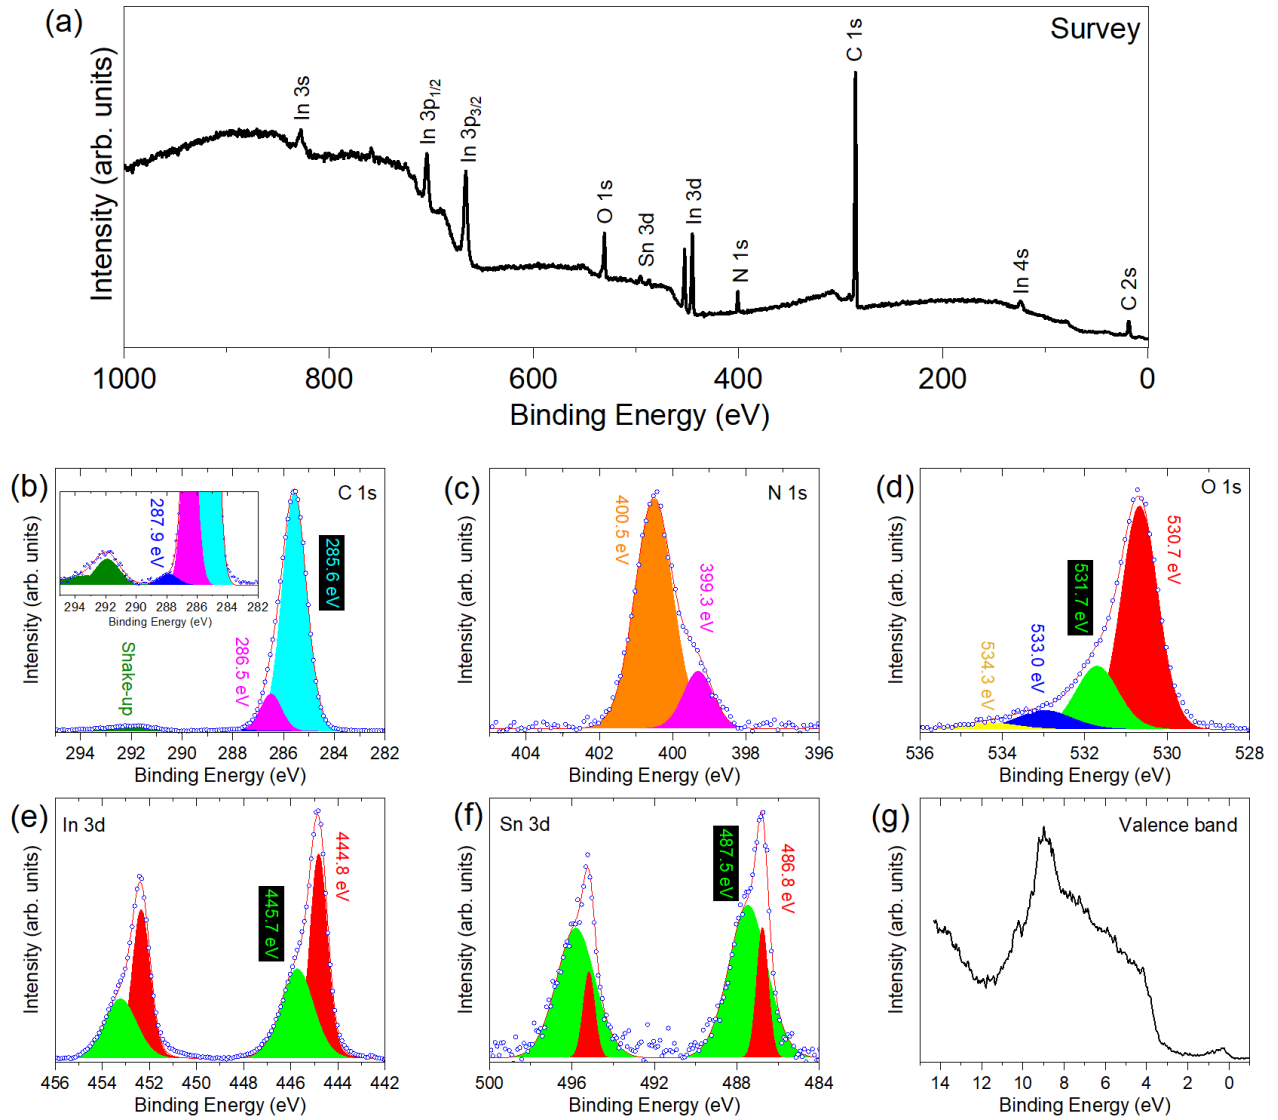

Figure S12: Bulk sensitivity of HAXPES measurements on the Glass/ITO/PTAA structures: (a) Survey, (b) C 1s, (c) N 1s, (d) O 1s, (e) In 3d, (f) Sn 3d and (g) valence band (PTAA + ITO). Open circles are the experimental points, red lines the best fit, colored peaks the different components. Descriptions of C 1s, N 1s, O 1s, In 3d and Sn 3d components are reported in the Table S6.

Table S6: Experimental core level binding energy and components of C 1s, N 1s, O 1s, In 3d and Sn 3d from PTAA deposited on Glass/ITO substrate in Fig. S12.

| C 1s       |                                    | N 1s       |                 | O 1s       |                         | In 3d      |                                                    | Sn 3d      |                                       |
|------------|------------------------------------|------------|-----------------|------------|-------------------------|------------|----------------------------------------------------|------------|---------------------------------------|
| Peaks (eV) | Components                         | Peaks (eV) | Components (eV) | Peaks (eV) | Components              | Peaks (eV) | Components                                         | Peaks (eV) | Components                            |
| 285.6      | C sp <sup>2</sup> /sp <sup>3</sup> | 399.3      | -N...ITO        | 530.7      | -OH                     | 444.8      | ITO                                                | 486.8      | ITO                                   |
| 286.5      | C-N                                | 400.5      | PTAA            | 531.7      | ITO                     | 445.7      | In <sub>2</sub> O <sub>3-x</sub> (OH) <sub>y</sub> | 487.5      | Sn <sub>x</sub> O <sub>y</sub> /Sn-OH |
| 287.9      | C=O                                | -          | -               | 533.0      | C-O-C/H <sup>+</sup> OH | -          | -                                                  | -          | -                                     |
| 291.9      | Shaku-up                           | -          | -               | 534.3      | H-bonded (-OH...O(ITO)) | -          | -                                                  | -          | -                                     |
| 293.2      | Shaku-up                           | -          | -               | -          | -                       | -          | -                                                  | -          | -                                     |

# Glass/ITO/HaP/PTAA structures

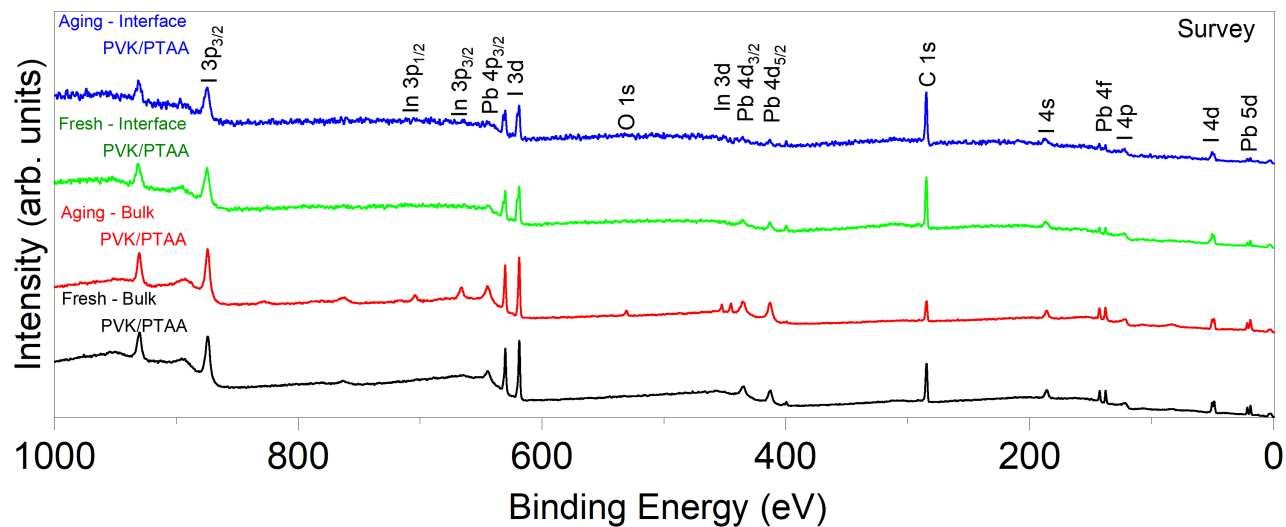

Figure S13: Surveys from Probing depth HAXPES measurements for fresh and aging Glass/ITO/HaP/PTAA structures

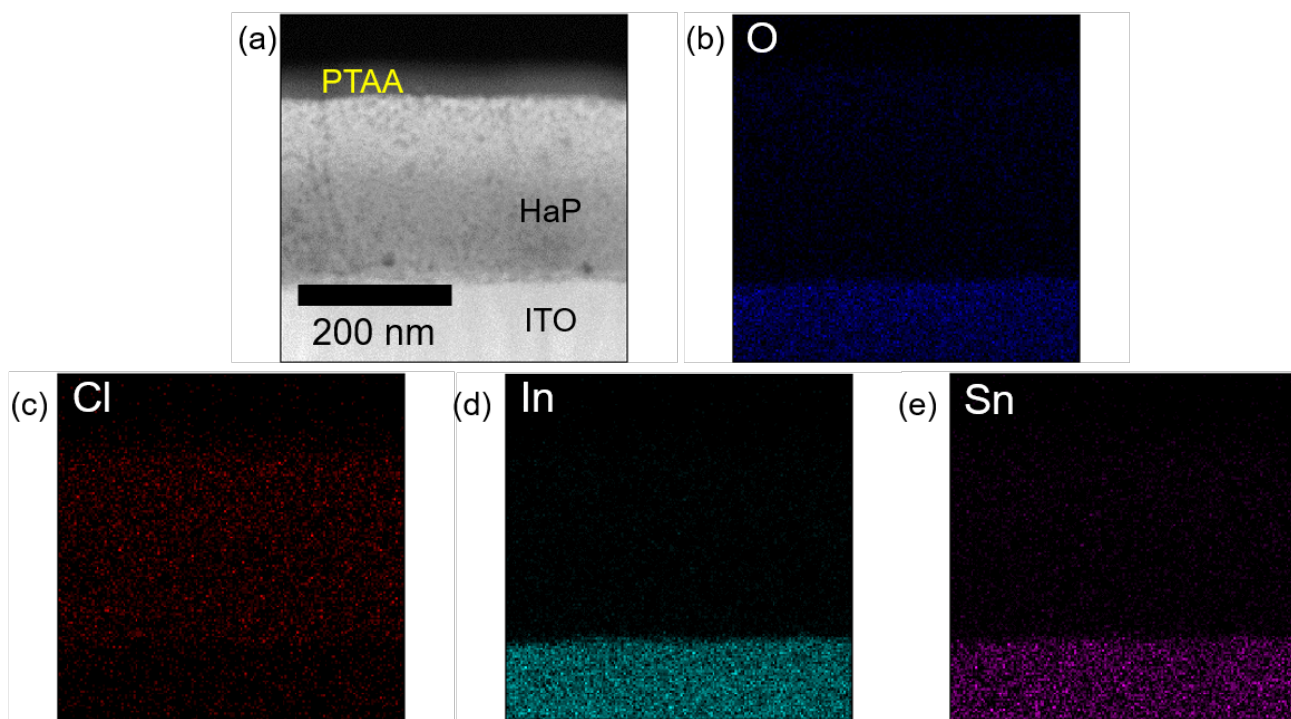

Figure S14: Cross-sectional STEM-ADF images and corresponding EDX maps of glass/ITO/HaP/PTAA structures. Glass/ITO/HaP/PTAA stacking (a) ADF image and individual chemical EDX maps of elemental (b) O, (c) Cl, (d) In and (e) Sn.

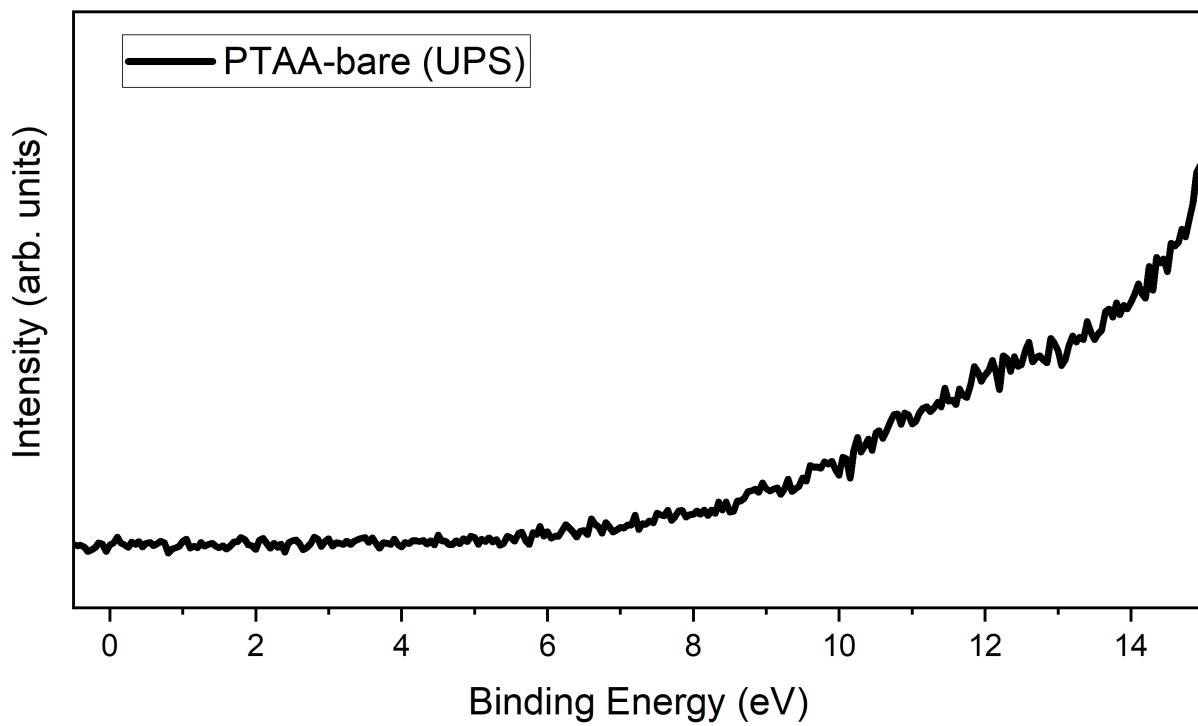

Figure S15: PTAA-bare valence band structure obtained from ultraviolet photoelectron spectroscopy (UPS).
